# Supplementary material for: pH-Switchable electroactive composite films of carboxylated multi-walled carbon nanotubes and Prussian blue
Source: Royal Society of Chemistry journal article supplement (doi:10.1039/c5ra21751b), 2015-01-01
Supplement: c5ra21751b1.pdf [file c5ra21751b1.pdf]

## Supporting Information

### **pH-Switchable Electroactive Composite Films of Carboxylated Multi-walled Carbon Nanotubes and Prussian Blue**

Ying Tong, Yuanyuan Wang, Bowen Gao, Lei Su,<sup>\*</sup> and Xueji Zhang<sup>\*</sup>

Research Center for Bioengineering and Sensing Technology, School of Chemistry and Biological Engineering, University of Science and Technology Beijing, Beijing 100083, China.

<sup>\*</sup> Corresponding authors. E-mail address: [sulei@ustb.edu.cn](mailto:sulei@ustb.edu.cn) (L.S.), [zhangxueji@ustb.edu.cn](mailto:zhangxueji@ustb.edu.cn) (X.J.Z.).

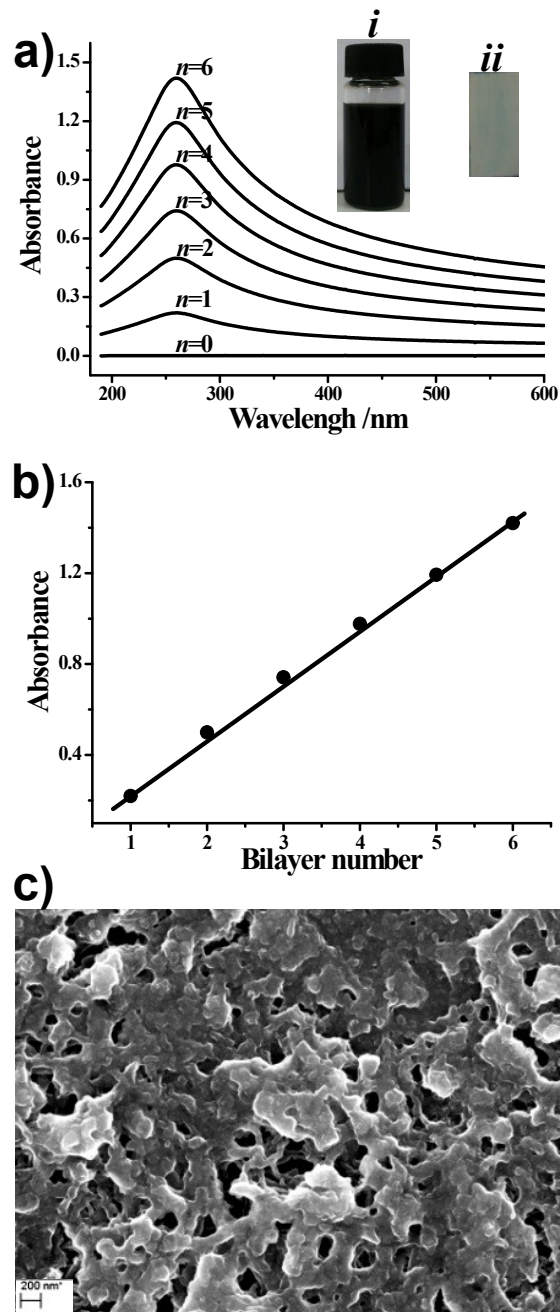

**Fig. S1** a) UV-vis absorption spectra of the CMWCNT multilayers. Inset: photographs of the CMWCNTs dispersed in aqueous solution (item *i*) and the CMWCNT multilayer film (item *ii*). b) Plot of the linearity between the absorbance values at 260 nm versus the bilayer number. c) SEM image of the CMWCNT multilayer film.

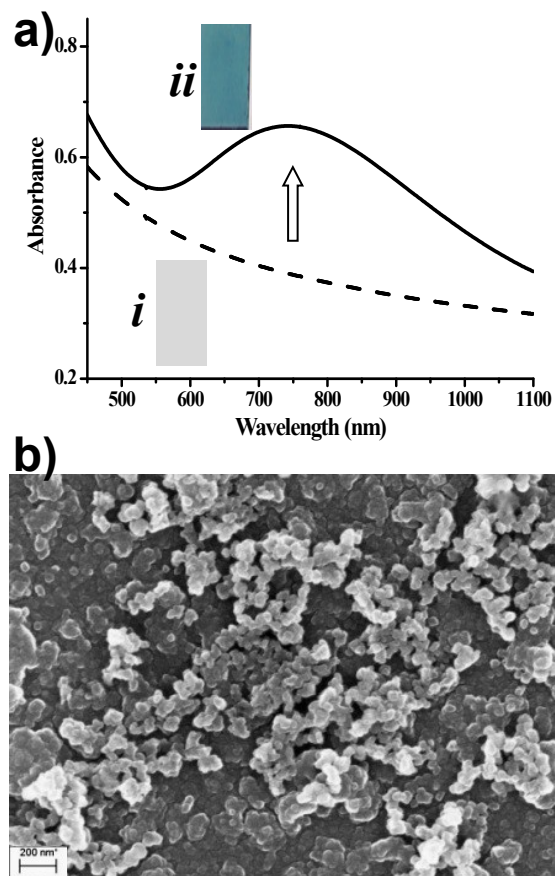

**Fig. S2** a) UV-vis absorption spectra of the CMWCNTs@PB composite film (solid line) and the CMWCNTs film (dashed line). Inset: photographs of the CMWCNTs film (item *i*) and the CMWCNTs@PB composite film (item *ii*). b) SEM image of the CMWCNTs@PB composite film.

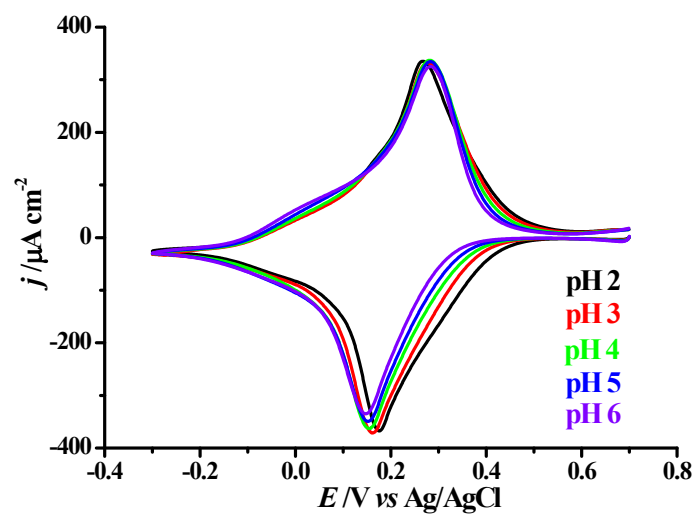

**Fig. S3** Cyclic voltammetric curves of the PB modified ITO electrode prepared via an electrochemical PB deposition method at different pH values at a scan rate of 20  $\text{mV s}^{-1}$ .

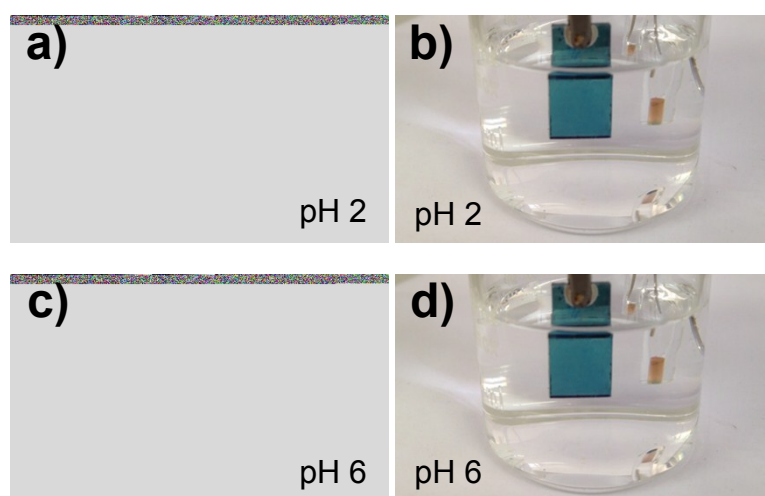

**Fig. S4** Screen pictures captured from the videotapes of the PB modified ITO electrode undergoing cyclic potential sweeps between 0.6 and 0.1 V vs Ag/AgCl at a scan rate of  $20 \text{ mV s}^{-1}$ . a) pH 2, 0.1 V; b) pH 2, 0.6 V; c) pH 6, 0.1 V; d) pH 6, 0.6 V. The light grey was the color of the CMWCNT multilayer-coated ITO glass. From these pictures, it can be seen that the PB modified electrode has the common electrochromic behaviors regardless of pH.

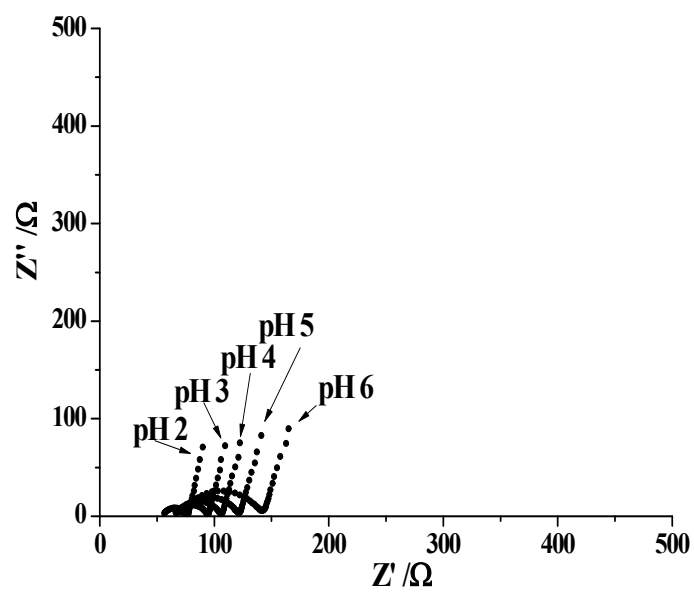

**Fig. S5** Electrochemical impedance spectra of the PB modified electrode at different pH.
